# Supplementary material
Source: ML conference proceedings conference paper supplement (https://aclanthology.org/2025.bionlp-1.16)

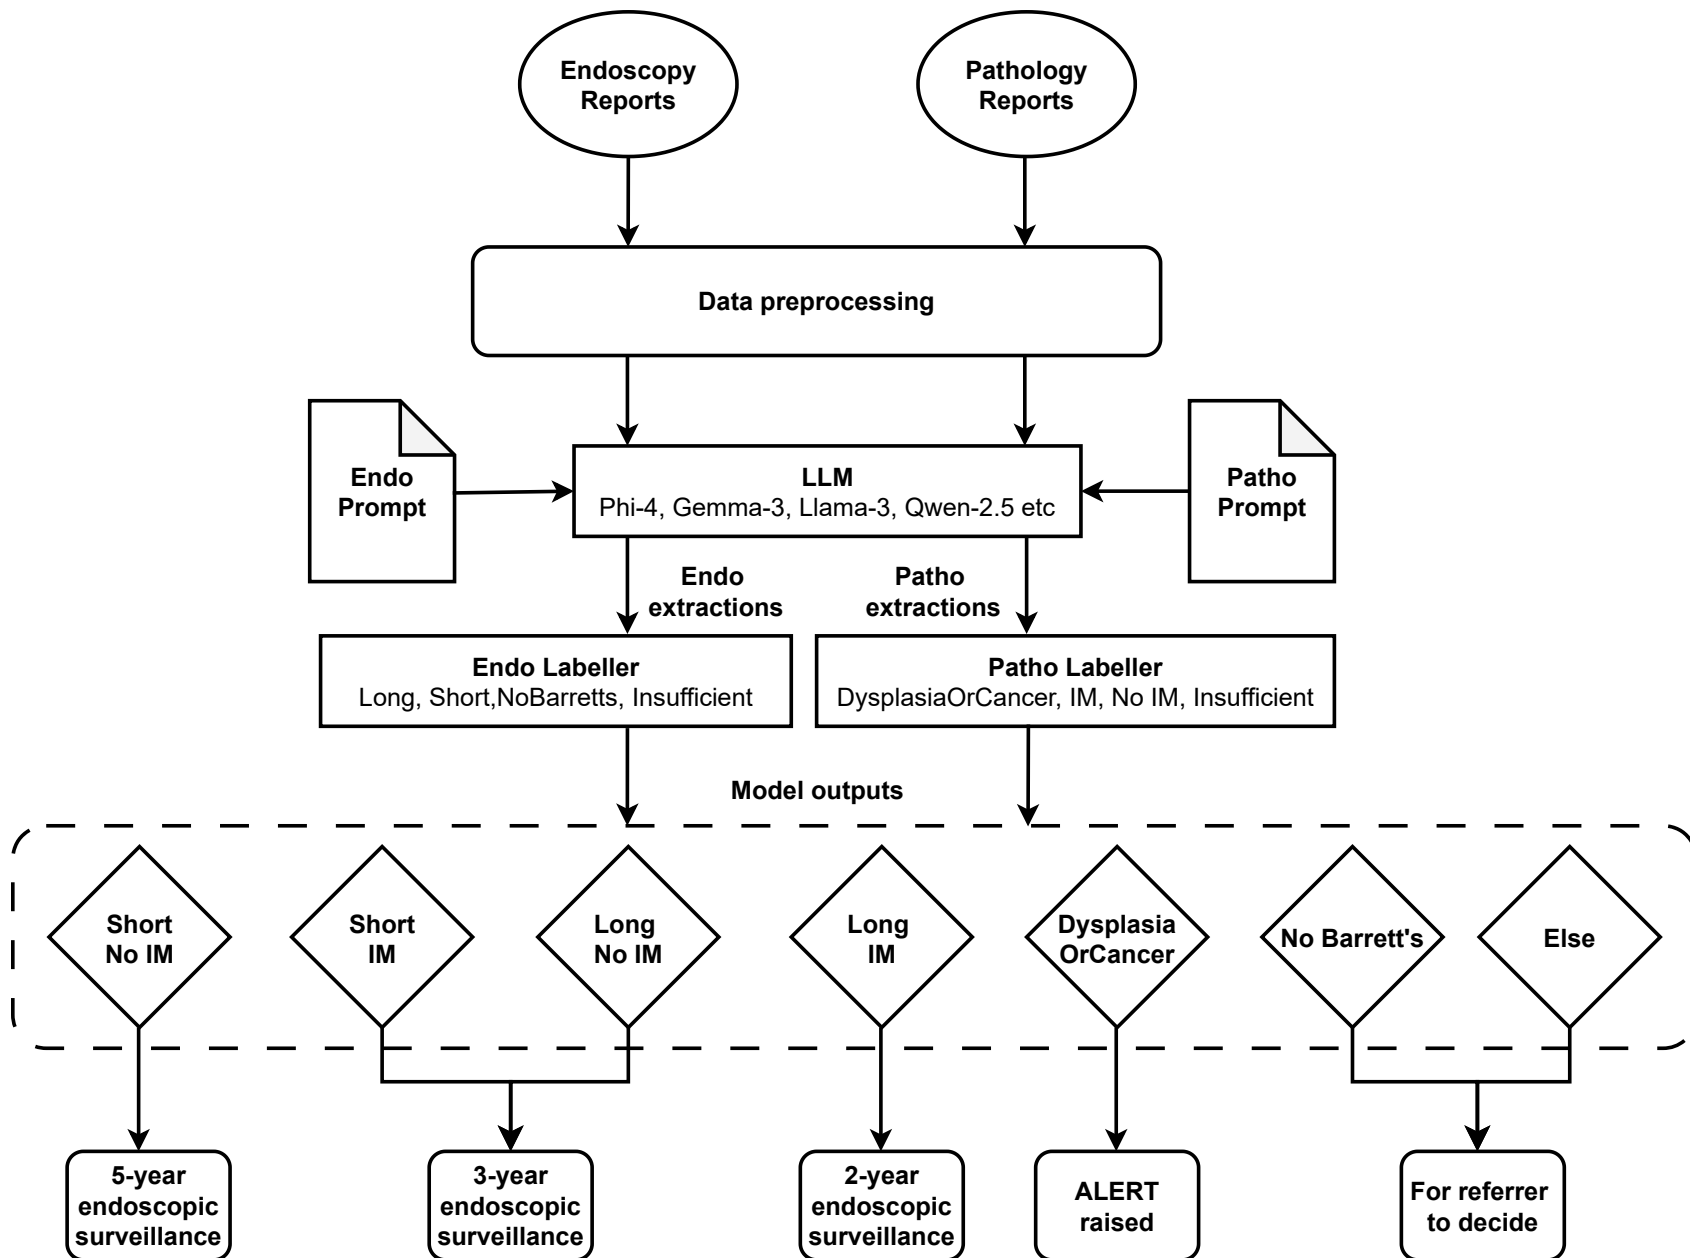

Supplement: SupplementaryMaterial [file 2025.bionlp-1.16.SupplementaryMaterial.zip]
